# Supplementary material for: Caffeine increases motor output entropy and performance in 4 km cycling time trial
Source: PLoS One. 2020 Aug 13;15(8):e0236592. doi: 10.1371/journal.pone.0236592 (PMC7425963; doi:10.1371/journal.pone.0236592)
Supplement: S1 Raw data — (XLSX) [file pone.0236592.s001.xlsx]

## Sheet: PLA_quartile
Cyclist 1				Cyclist 2				Cyclist 3				Cyclist 4				Cyclist 5				Cyclist 6				Cyclist 7				Cyclist 8				Cyclist 9
Distance	power output	Sample_entropy		Distance	power output	Sample_entropy		Distance	power output	Sample_entropy		Distance	power output	Sample_entropy		Distance	power output	Sample_entropy		Distance	power output	Sample_entropy		Distance	power output	Sample_entropy		Distance	power output	Sample_entropy		Distance	power output	Sample_entropy
0	253.783	0.402521		0	295.775	0.764099		0	369.233	1.10974		0	264.058	0.76581		0	467.025	0.515466		0	323.775	0.300512		0	414.575	0.617007		0	312.775	1.37191		0	405.983	0.544686
0.0615385	271.3	0.337236		0.0714286	293.817	0.887303		0.0666667	382.467	1.76929		0.0634921	267.433	0.990982		0.0655738	472.375	0.635736		0.0727273	345.192	0.491121		0.0888889	427.9	1.05513		0.0677966	322.333	1.59963		0.0689655	425.467	0.789997
0.123077	289.325	0.410714		0.142857	295.008	0.842103		0.133333	376.392	1.77307		0.126984	263.092	1.13442		0.131148	451.358	0.614307		0.145455	344.175	0.814041		0.177778	419.233	1.03524		0.135593	322.208	1.47591		0.137931	401.342	1.29514
0.184615	305.3	0.537536		0.214286	291.792	0.927495		0.2	373.608	1.56065		0.190476	261.442	1.11722		0.196721	430.6	0.577822		0.218182	342.375	0.957059		0.266667	411.167	0.889058		0.20339	318.642	1.55702		0.206897	393.458	1.40837
0.246154	318.267	0.790457		0.285714	291.3	1.12145		0.266667	373.758	1.43423		0.253968	259.758	1.10671		0.262295	396.008	0.340927		0.290909	349.908	0.797883		0.355556	399.067	0.878984		0.271186	315.567	1.53533		0.275862	380.025	1.53882
0.307692	325.025	0.990803		0.357143	286.15	1.20052		0.333333	370.192	1.3504		0.31746	258.342	1.94591		0.327869	379.467	0.37984		0.363636	355.95	0.812555		0.444444	388.633	0.745718		0.338983	317.858	1.45059		0.344828	375.408	1.56564
0.369231	327.217	1.12421		0.428571	282.358	1.39711		0.4	365.442	1.23745		0.380952	256.9	1.9548		0.393443	363.742	0.488591		0.436364	363.925	0.757686		0.533333	375.933	0.833505		0.40678	310	1.67229		0.413793	368.867	1.41311
0.430769	322.483	1.47182		0.5	280.792	1.51983		0.466667	356.333	1.04469		0.444444	255.742	1.97234		0.459016	351.292	0.488255		0.509091	368.642	0.834084		0.622222	364.725	0.863493		0.474576	310.65	1.77886		0.482759	358.433	1.35864
0.492308	322.633	1.44607		0.571429	291.608	1.49549		0.533333	349.392	1.09861		0.507937	251.925	1.22378		0.52459	338	0.590656		0.581818	373.075	0.952137		0.711111	356.092	0.818652		0.542373	309.408	1.65345		0.551724	353.375	1.58697
0.553846	321.592	1.40967		0.642857	302	1.30833		0.6	343.6	0.888456		0.571429	251.7	1.16121		0.590164	327.367	0.657301		0.654545	379.267	1.09861		0.8	346.917	0.860626		0.610169	309.425	1.72591		0.62069	348.65	1.57469
0.615385	319.75	2.1454		0.714286	308.875	1.37432		0.666667	337.092	0.852777		0.634921	250.733	1.14295		0.655738	322.175	0.696543		0.727273	381.158	1.11088		0.888889	339.008	0.974859		0.677966	306.25	1.77777		0.689655	343.408	1.65542
0.676923	318.925	2.11844		0.785714	313.358	1.4373		0.733333	331.842	0.815416		0.698413	249.142	1.16977		0.721311	319.767	0.681424		0.8	384.308	1.11241		0.977778	333.633	1.09126		0.745763	308.083	1.72066		0.758621	340.242	1.39586
0.738462	315.992	1.31673		0.857143	314.808	1.39813		0.8	323.55	0.824272		0.761905	247.592	1.26041		0.786885	314.383	0.670433		0.872727	384.625	1.15967		1.06667	328.25	1.05961		0.813559	307.9	1.95644		0.827586	332.408	1.3616
0.8	312.225	1.5079		0.928571	318.383	1.4032		0.866667	317.117	0.914663		0.825397	246.583	1.17865		0.852459	309.8	0.622427		0.945455	383.067	1.15672		1.15556	323.158	1.34373		0.881356	305.067	2.07944		0.896552	328.617	1.37372
0.861538	308.042	1.55409		1	314.825	1.51571		0.933333	311.217	1.00823		0.888889	245.258	1.18253		0.918033	306.308	0.635073		1.01818	383.375	1.18199		1.24444	317.908	1.71122		0.949153	305.083	1.86845		0.965517	327.867	1.36783
0.923077	305.075	1.55335		1.07143	318.933	1.4253		1	304.133	1.34529		0.952381	243.917	1.19042		0.983607	304.467	0.660776		1.09091	383.833	1.1331		1.33333	314.05	1.72144		1.01695	304.492	1.94591		1.03448	321.875	1.3273
0.984615	302.85	1.5061		1.14286	321.125	1.35812		1.06667	298.5	1.39109		1.01587	241.542	1.21088		1.04918	319.483	1.68313		1.16364	379.075	1.07547		1.42222	310.3	1.66314		1.08475	303.767	1.73039		1.10345	319.508	1.24765
1.04615	302.425	1.48573		1.21429	327.5	1.44345		1.13333	292.942	1.58045		1.07937	239.617	1.23334		1.11475	314.6	1.50708		1.23636	376.042	1.09521		1.51111	307.392	1.69378		1.15254	303.35	1.7492		1.17241	312.708	1.3616
1.10769	301.3	1.42521		1.28571	333.8	1.53265		1.2	289.233	1.46441		1.14286	238.85	1.18639		1.18033	310.7	1.60944		1.30909	371.567	1.49009		1.6	305.383	1.79176		1.22034	305.308	1.59794		1.24138	312.325	1.49009
1.16923	299.617	1.56952		1.35714	337.533	1.49165		1.26667	290.242	1.43392		1.20635	237.192	1.16149		1.2459	304.275	1.53533		1.38182	371.192	1.53393		1.68889	302.55	1.74193		1.28814	304.192	1.6704		1.31034	314.45	1.51305
1.23077	296.6	1.57973		1.42857	335.85	1.678		1.33333	287.958	1.71864		1.26984	238.758	1.70161		1.31148	304.792	1.5442		1.45455	372.142	1.2159		1.77778	299.708	1.70161		1.35593	304.333	1.58412		1.37931	311.7	1.40735
1.29231	293.775	1.50408		1.5	337.125	1.78479		1.4	286.9	1.58924		1.33333	236.833	1.74664		1.37705	304.358	1.4321		1.52727	368.592	1.26025		1.86667	297.517	1.69255		1.42373	306.608	1.56339		1.44828	311.133	1.43812
1.35385	291.383	1.5631		1.57143	343.067	1.53882		1.46667	284.35	1.62924		1.39683	236.3	1.79176		1.44262	301.808	1.33061		1.6	367.367	1.78415		1.95556	294.942	1.56124		1.49153	307.983	1.58475		1.51724	312.35	1.45991
1.41538	289.4	1.32711		1.64286	344.375	1.5506		1.53333	281.8	1.76099		1.46032	235.808	1.89712		1.5082	296.008	1.24571		1.67273	367.383	1.64866		2.04444	292.7	1.46634		1.55932	309.275	1.58475		1.58621	312.508	1.32972
1.47692	288.667	1.50219		1.71429	342.892	1.39568		1.6	280.717	1.81773		1.52381	235.983	1.93794		1.57377	293.667	1.16899		1.74545	365.925	1.44345		2.13333	290.267	1.42476		1.62712	309	1.63611		1.65517	312.75	1.40464
1.53846	289.7	1.53393		1.78571	348.65	1.38174		1.66667	279.133	1.82735		1.5873	234.7	1.8718		1.63934	291.692	1.16513		1.81818	365.475	1.40133		2.22222	287.192	1.40961		1.69492	311	1.6864		1.72414	308.092	1.41585
1.6	290.575	1.4031		1.85714	353.442	1.32914		1.73333	278.283	1.99036		1.65079	234.167	1.86075		1.70492	287.35	1.22026		1.89091	365.083	1.37951		2.31111	285.425	1.35455		1.76271	309.675	1.66375		1.7931	304.325	1.37087
1.66154	290.4	1.40369		1.92857	354.167	1.22454		1.8	278.142	1.83828		1.71429	233.858	2.01882		1.77049	283.758	1.23773		1.96364	363.925	1.42139		2.4	283.158	1.39551		1.83051	311.933	1.78507		1.86207	302.275	1.29392
1.72308	291.225	1.42372		2	355.833	0.97405		1.86667	276.875	1.86075		1.77778	232.267	2.01882		1.83607	281.742	1.25483		2.03636	364	1.47938		2.48889	282.75	1.47773		1.89831	310.842	2.07944		1.93103	304.867	1.35239
1.78462	288.792	1.39045		2.07143	348.825	0.961141		1.93333	276.108	1.81327		1.84127	232.2	2.07206		1.90164	281.3	1.42569		2.10909	362.583	1.49851		2.57778	281.167	1.39052		1.9661	311.092	1.86895		2	309.633	1.42712
1.84615	287.867	1.43239		2.14286	337.842	0.724238		2	276.167	1.85772		1.90476	232.208	1.8589		1.96721	281.275	1.33181		2.18182	361.767	1.46634		2.66667	279.725	1.37103		2.0339	311.683	1.7802		2.06897	311.9	1.5449
1.90769	285.575	1.39893		2.21429	328.917	0.690606		2.06667	275.167	1.90211		1.96825	232.75	1.79815		2.03279	281.625	1.38182		2.25455	361.35	1.34944		2.75556	279.483	1.34871		2.10169	311.567	1.92181		2.13793	312.475	1.43797
1.96923	285.567	1.59963		2.28571	326.675	0.682509		2.13333	273.208	1.80555		2.03175	231.992	1.82589		2.09836	279.492	1.56124		2.32727	358.9	1.50962		2.84444	279.858	1.3007		2.16949	310.875	1.85003		2.2069	313.575	1.26667
2.03077	286.9	1.56862		2.35714	321.467	0.641262		2.2	270.792	1.72804		2.09524	229.567	1.66188		2.16393	274.175	1.54802		2.4	357.65	1.5329		2.93333	280.742	1.25276		2.23729	308.867	1.69591		2.27586	312.108	1.2905
2.09231	286.733	1.60944		2.42857	313.875	0.696287		2.26667	270.383	1.60944		2.15873	228.158	1.61741		2.22951	272.475	1.69867		2.47273	359.525	1.69591		3.02222	280.258	1.35455		2.30508	308.867	1.70475		2.34483	309.85	1.33041
2.15385	286.6	1.63083		2.5	309.483	0.768966		2.33333	271.467	1.65658		2.22222	226.35	1.70788		2.29508	274.667	1.81081		2.54545	359.575	1.49581		3.11111	278.617	1.39196		2.37288	307.842	1.66501		2.41379	308.908	1.57307
2.21538	286.533	1.60443		2.57143	308.083	0.763059		2.4	272.033	1.63576		2.28571	224.383	1.77374		2.36066	273.842	1.82109		2.61818	359.333	1.49752		3.2	278.225	1.31858		2.44068	309.342	1.54638		2.48276	310.35	1.57819
2.27692	282.742	1.45893		2.64286	301.875	0.850776		2.46667	269.942	1.68176		2.34921	222.817	1.76473		2.42623	274.075	1.81081		2.69091	359.875	1.41908		3.28889	279.733	1.53769		2.50847	307.925	1.61514		2.55172	313.683	1.46426
2.33846	276.217	1.27736		2.71429	297.75	1.15577		2.53333	269.433	1.62362		2.4127	221.833	1.93908		2.4918	272.792	1.79791		2.76364	357.883	1.60944		3.37778	280.108	1.65456		2.57627	310.808	1.58412		2.62069	316.917	1.42583
2.4	270.958	1.10777		2.78571	292.825	1.22139		2.6	269.217	1.61397		2.47619	220.433	1.68777		2.55738	272	1.7193		2.83636	357.558	1.57898		3.46667	281.817	1.79176		2.64407	309.25	1.60443		2.68966	319.158	1.35095
2.46154	268.533	1.07705		2.85714	282.15	1.22459		2.66667	267.85	1.66351		2.53968	221.467	1.6614		2.62295	271.375	1.75209		2.90909	356.667	1.47182		3.55556	281.092	1.81156		2.71186	311.125	2.05951		2.75862	321.067	1.42139
2.52308	267.975	1.07304		2.92857	282.583	1.17307		2.73333	265.625	1.77374		2.60317	222.117	1.64223		2.68852	272.25	1.72645		2.98182	356.975	1.49503		3.64444	284.092	1.60124		2.77966	311.758	1.63696		2.82759	320.458	1.45529
2.58462	264.867	1.20397		3	297.092	1.18427		2.8	264.55	1.70788		2.66667	220.875	1.75094		2.7541	274.067	1.34645		3.05455	358.125	1.57665		3.73333	286.858	1.60498		2.84746	310.85	2.23136		2.89655	317.6	1.59109
2.64615	262.625	1.35688		3.07143	311	1.13902		2.86667	261.683	1.62693		2.73016	221.842	1.9231		2.81967	276.308	1.27123		3.12727	359.375	1.39503		3.82222	287.9	1.7148		2.91525	313.758	1.76191		2.96552	316.992	1.56609
2.70769	261.142	1.22807		3.14286	315.492	1.25276		2.93333	260.992	1.5272		2.79365	222.467	1.67669		2.88525	277.55	1.29473		3.2	359.567	1.35669		3.91111	287.608	1.62746		2.98305	314.65	1.66073		3.03448	317.583	1.43848
2.76923	257.7	1.22297		3.21429	326.575	1.0325		3	260.992	1.47381		2.85714	223.4	1.68808		2.95082	282.383	1.28182		3.27273	362.75	1.30796		4	287.65	1.59601		3.05085	315.5	2.0662		3.10345	324.083	1.35812
2.83077	255.508	1.26601		3.28571	334.275	0.964182		3.06667	260.842	1.45001		2.92063	224.683	1.62531		3.01639	284.683	1.24635		3.34545	362.492	1.27465						3.11864	316.425	2.15305		3.17241	330.817	1.37055
2.89231	252.6	1.32301		3.35714	339.008	0.961411		3.13333	258.542	1.41866		2.98413	229.075	1.40035		3.08197	286.392	1.31283		3.41818	363.833	1.1987						3.18644	314.408	1.78271		3.24138	333.825	1.22903
2.95385	250.092	1.36372		3.42857	351.092	0.821896		3.2	257.242	1.32034		3.04762	230.683	1.57435		3.14754	288.342	1.28549		3.49091	365.308	1.26165						3.25424	314.392	1.67688		3.31034	340.575	1.14513
3.01538	249.717	1.26809		3.5	354.875	0.881457		3.26667	257.333	1.32176		3.11111	233.083	1.59645		3.21311	287.942	1.24687		3.56364	366.508	1.35584						3.32203	315.783	1.66771		3.37931	351.258	0.874145
3.07692	251.008	1.79769		3.57143	365.625	0.884382		3.33333	254.858	1.93486		3.1746	234.083	1.56996		3.27869	289.058	1.36432		3.63636	365.808	1.52847						3.38983	315.85	1.58591		3.44828	360.025	0.939105
3.13846	253.4	1.79749		3.64286	368.633	0.936769		3.4	252.117	1.46821		3.2381	235.442	1.7148		3.34426	291.392	1.38282		3.70909	364.275	1.27046						3.45763	318.767	1.40118		3.51724	372.842	0.990399
3.2	253.9	1.81449		3.71429	375.217	1.10272		3.46667	251.075	1.57867		3.30159	236.442	1.90793		3.40984	293.25	1.6187		3.78182	365.292	1.24889						3.52542	318.467	1.40213		3.58621	376.567	0.988331
3.26154	254.175	1.84372		3.78571	379.258	1.16821		3.53333	254.017	1.58329		3.36508	236.35	1.97408		3.47541	292.1	1.54638		3.85455	365.908	1.50708						3.59322	319.017	1.45466		3.65517	381.125	0.991844
3.32308	256.2	1.77156		3.85714	381.65	1.13943		3.6	254.508	1.52184		3.42857	236.917	1.90954		3.54098	290.117	1.51706		3.92727	365.692	1.60297						3.66102	322.125	1.46634		3.72414	391.258	1.03889
3.38462	257.825	1.83258		3.92857	378.158	1.2104		3.66667	255.892	1.89417		3.49206	235.633	2.07284		3.60656	288.35	1.60336		4	365.442	1.60354						3.72881	321.583	1.47381		3.7931	400.5	1.11949
3.44615	257.8	1.80049		4	375.317	0.994039		3.73333	258.658	1.95303		3.55556	236.033	2.00821		3.67213	287.15	1.59393										3.79661	326.375	1.36196		3.86207	413.642	1.1077
3.50769	257.817	1.71765						3.8	257.283	1.65999		3.61905	237.425	2.25129		3.7377	288.917	1.60416										3.86441	329.558	1.38084		3.93103	424.417	0.967584
3.56923	258.442	1.6181						3.86667	257.583	1.70811		3.68254	241.55	1.62746		3.80328	293.358	1.20305										3.9322	331.017	1.31687		4	432.717	1.20709
3.63077	262.125	1.68858						3.93333	259.717	1.7123		3.74603	243.108	1.58989		3.86885	296.225	1.16971										4	333.375	1.43392
3.69231	269.017	1.39331						4	261.508	1.67398		3.80952	245.142	1.54962		3.93443	299.833	1.04425
3.75385	276.2	1.40534										3.87302	245.967	1.31058		4	304.975	0.963637
3.81538	284.125	1.39777										3.93651	245.892	1.32338
3.87692	293.825	1.39013										4	251.433	1.27297
3.93846	301.283	1.45725
4	308.933	1.38157
Q1
Q2
Q3
Q4

## Sheet: CAF_quartile
Cyclist 1				Cyclist 2				Cyclist 3				Cyclist 4				Cyclist 5				Cyclist 6				Cyclist 7				Cyclist 8				Cyclist 9
Distance	power output	Sample_entropy		Distance	power output	Sample_entropy		Distance	power output	Sample_entropy		Distance	power output	Sample_entropy		Distance	power output	Sample_entropy		Distance	power output	Sample_entropy		Distance	power output	Sample_entropy		Distance	power output	Sample_entropy		Distance	power output	Sample_entropy
0	348.333	0.98788		0	317.325	0.921495		0	329.667	1.02073		0	329.342	0.553233		0	426.767	1.19524		0	322.417	0.493366		0	416.908	0.539223		0	364.108	1.13795		0	340.808	0.784778
0.0689655	355.008	1.20094		0.0754717	326.225	1.02075		0.0677966	336.85	1.6864		0.0634921	344	1.08913		0.0701754	427.642	1.31432		0.0714286	334.058	0.625884		0.0701754	431.717	0.82825		0.0655738	380.433	1.23873		0.0769231	356.383	1.09155
0.137931	348.125	1.3375		0.150943	313.175	1.45316		0.135593	335.442	1.5294		0.126984	342.358	1.74216		0.140351	420.425	1.31354		0.142857	325.108	1.11199		0.140351	418.717	1.17412		0.131148	362.658	1.84124		0.153846	347.383	1.87877
0.206897	347.967	1.24879		0.226415	303.808	1.38629		0.20339	336.225	1.50935		0.190476	337.517	1.56767		0.210526	413.258	1.25708		0.214286	321.425	1.40464		0.210526	410.042	1.07656		0.196721	358.05	1.76359		0.230769	345.392	2.16244
0.275862	352.042	1.34062		0.301887	306.617	1.24079		0.271186	337.05	1.58697		0.253968	331.583	1.60944		0.280702	406.625	1.22121		0.285714	320.15	1.79176		0.280702	399.133	1.0404		0.262295	351.85	1.75642		0.307692	344.65	2.21297
0.344828	348.133	1.25862		0.377358	305.283	1.34501		0.338983	338	1.6946		0.31746	327.125	1.54853		0.350877	398.983	1.15073		0.357143	319.858	1.77649		0.350877	389.117	1.05076		0.327869	355.225	1.91537		0.384615	346.692	1.93836
0.413793	349.833	1.39149		0.45283	303.267	1.55931		0.40678	339.85	1.62992		0.380952	320.5	1.18562		0.421053	390.308	1.08352		0.428571	320.75	1.71654		0.421053	380.833	1.00846		0.393443	350.85	2.06263		0.461538	347.992	1.86775
0.482759	349.017	1.29277		0.528302	301.2	1.39025		0.474576	339.225	1.62362		0.444444	313.808	1.22465		0.491228	382.867	0.940388		0.5	319.717	1.63064		0.491228	373.325	1.16449		0.459016	344.533	1.82033		0.538462	347.483	1.86727
0.551724	345.942	1.23146		0.603774	297.908	1.21135		0.542373	338.925	1.63225		0.507937	307.733	1.24319		0.561404	373.3	0.950192		0.571429	319.725	1.51878		0.561404	364.867	1.19901		0.52459	339.317	1.85494		0.615385	345.558	1.34571
0.62069	346.992	1.30236		0.679245	300.25	1.2018		0.610169	338.6	1.68355		0.571429	299.408	1.27629		0.631579	367.558	0.938596		0.642857	318.758	1.45225		0.631579	356.008	1.53345		0.590164	335.358	2.0266		0.692308	342.083	1.50725
0.689655	346.4	1.17657		0.754717	312.2	1.05236		0.677966	338.517	1.79931		0.634921	294.217	1.25518		0.701754	360.392	0.938891		0.714286	319.85	1.35963		0.701754	350.775	1.51691		0.655738	331.742	1.77234		0.769231	344.65	1.49711
0.758621	346.192	1.28884		0.830189	325.492	1.03851		0.745763	337.4	1.79966		0.698413	289.95	1.20127		0.77193	354.75	0.924949		0.785714	321.05	1.32176		0.77193	347.617	1.34291		0.721311	326.917	1.76359		0.846154	342.075	1.53148
0.827586	340.358	1.10471		0.90566	336.167	1.05029		0.813559	336.717	1.78339		0.761905	284.742	1.2353		0.842105	348.158	0.946874		0.857143	322.45	1.3819		0.842105	343.208	1.23353		0.786885	324.808	1.7492		0.923077	340.025	1.59601
0.896552	333.65	1.07592		0.981132	338.758	0.979722		0.881356	333.458	1.62746		0.825397	278.683	1.38629		0.912281	342.258	1.16761		0.928571	324.583	1.49065		0.912281	338.817	1.14828		0.852459	320.317	1.81423		1	340.15	1.54045
0.965517	328.65	0.977849		1.0566	343.075	0.966014		0.949153	332.717	1.61991		0.888889	272.4	1.70199		0.982456	335.567	1.17632		1	326.433	1.47591		0.982456	332.433	1.164		0.918033	315.825	2.08774		1.07692	337.725	1.5007
1.03448	320.208	0.954881		1.13208	344.883	0.867035		1.01695	331.208	1.7346		0.952381	266.333	1.65572		1.05263	330.908	1.18335		1.07143	327.942	1.45374		1.05263	328.267	1.52606		0.983607	308.475	1.90211		1.15385	332.025	1.39303
1.10345	312.908	0.989289		1.20755	338.425	0.929536		1.08475	327.883	1.71351		1.01587	261.883	2.10006		1.12281	326.25	1.32063		1.14286	330.808	1.09331		1.12281	324.133	1.41296		1.04918	308.067	1.74691		1.23077	329.983	1.25276
1.17241	312.683	1.00502		1.28302	344.2	0.848561		1.15254	326.267	1.63204		1.07937	259.008	1.9521		1.19298	320.992	1.32539		1.21429	333	1.15518		1.19298	320.233	1.2205		1.11475	302.717	1.64363		1.30769	326.658	1.63665
1.24138	306.675	1.04656		1.35849	348.825	0.930997		1.22034	324.258	1.90707		1.14286	256.217	2.04769		1.26316	314.4	1.19654		1.28571	334.25	1.26902		1.26316	318.15	1.32442		1.18033	299.808	1.61741		1.38462	324.092	1.58127
1.31034	303.033	1.15745		1.43396	351.25	0.95252		1.28814	324.6	1.8295		1.20635	254.183	1.94591		1.33333	309.35	1.18909		1.35714	335.6	1.30833		1.33333	315.667	1.26567		1.2459	304.208	1.66393		1.46154	324.833	1.50708
1.37931	299.417	1.13498		1.50943	359.458	0.965562		1.35593	324.442	1.7492		1.26984	250.933	1.87514		1.40351	305.567	1.23499		1.42857	338.258	1.29766		1.40351	313.067	1.17702		1.31148	304.3	1.69823		1.53846	325.775	1.47727
1.44828	295.442	1.15201		1.58491	359.283	1.11676		1.42373	324.067	1.79868		1.33333	248.85	1.95942		1.47368	302.425	1.46258		1.5	341.258	1.23214		1.47368	311.208	1.55814		1.37705	304.167	2.18792		1.61538	326.575	1.43972
1.51724	292.175	1.29928		1.66038	354.167	1.1314		1.49153	323.467	1.94591		1.39683	245.717	1.9989		1.54386	299.358	1.51259		1.57143	341.75	1.29135		1.54386	308.225	1.54045		1.44262	304.075	2.29345		1.69231	323.817	1.49711
1.58621	286.775	1.31153		1.73585	350.183	1.28983		1.55932	323.583	1.9994		1.46032	244.058	2.13073		1.61404	297.925	1.59163		1.64286	341.233	1.66916		1.61404	306.458	1.70979		1.5082	300.542	1.97606		1.76923	324.558	1.59163
1.65517	286.225	1.56718		1.81132	344.292	1.31539		1.62712	321.842	2.06002		1.52381	242.95	2.21784		1.68421	293.85	1.5976		1.71429	342.908	1.71079		1.68421	304.508	1.68434		1.57377	298.533	2.1264		1.84615	325.442	1.50408
1.72414	285.683	1.3622		1.88679	338.858	1.31309		1.69492	321.533	1.72507		1.5873	240.483	2.21784		1.75439	292.142	1.50408		1.78571	343.408	1.74297		1.75439	304.608	1.65945		1.63934	296.925	2.00976		1.92308	324.95	1.38107
1.7931	286.467	1.44561		1.96226	330.958	1.24432		1.76271	321.142	2.17682		1.65079	237.917	2.22303		1.82456	289.117	1.40089		1.85714	343.883	1.77156		1.82456	305.55	1.54802		1.70492	298.267	1.73166		2	326.275	1.38174
1.86207	288.767	1.52776		2.03774	329.358	1.34166		1.83051	320.142	2.03377		1.71429	238.308	2.24819		1.89474	285.858	1.62268		1.92857	345.017	1.84055		1.89474	304.125	1.46508		1.77049	298	1.68053		2.07692	328.908	1.50408
1.93103	285.767	1.37126		2.11321	327.942	1.21194		1.89831	320.867	2.10587		1.77778	237.792	2.24295		1.96491	283.933	1.678		2	348.867	1.40425		1.96491	305.3	1.40369		1.83607	296.967	1.72616		2.15385	327.775	1.54223
2	283.575	1.39813		2.18868	319.85	1.2963		1.9661	320.767	2.35138		1.84127	236.733	2.12931		2.03509	284.775	1.53821		2.07143	351.808	1.15323		2.03509	305.958	1.39688		1.90164	296.283	2.09849		2.23077	329.142	1.46821
2.06897	283.05	1.42032		2.26415	313.55	1.25785		2.0339	319.975	2.23907		1.90476	236.975	1.96226		2.10526	286.633	1.59051		2.14286	354.733	1.15268		2.10526	304.308	1.34783		1.96721	294.45	2.05229		2.30769	329.942	1.43392
2.13793	280.142	1.41707		2.33962	310.375	1.22867		2.10169	318.467	2.11223		1.96825	236.125	2.30259		2.17544	286.458	1.40442		2.21429	358.075	1.15596		2.17544	304.317	1.43119		2.03279	292.125	2.03688		2.38462	328.042	1.53821
2.2069	278.392	1.32063		2.41509	304.683	1.49711		2.16949	317.417	1.92038		2.03175	234.783	1.81529		2.24561	285.717	1.48393		2.28571	358.133	1.30058		2.24561	302.833	1.48492		2.09836	291.833	1.8718		2.46154	331.1	1.49451
2.27586	276.333	1.32651		2.49057	299.833	1.63974		2.23729	313.508	1.97234		2.09524	235.017	1.86895		2.31579	285.55	1.54692		2.35714	358.933	1.20513		2.31579	302.433	1.49821		2.16393	286.8	1.86813		2.53846	331.717	1.52737
2.34483	274.633	1.30236		2.56604	295.725	1.49092		2.30508	311.092	1.70475		2.15873	235.642	1.82685		2.38596	283.925	1.50408		2.42857	361.183	1.31568		2.38596	301.558	1.56862		2.22951	287.083	1.91692		2.61538	334.783	1.62314
2.41379	273.392	1.26277		2.64151	291.583	1.68479		2.37288	310.292	1.56862		2.22222	235.525	1.90056		2.45614	283.717	1.56755		2.5	365.275	1.34925		2.45614	301.633	1.51787		2.29508	286.733	2.10261		2.69231	335.058	1.82625
2.48276	272.742	1.73039		2.71698	288.525	1.49752		2.44068	309.575	1.48638		2.28571	234.425	1.88498		2.52632	284.492	1.61469		2.57143	368.842	1.36243		2.52632	302.033	1.5384		2.36066	286.092	1.76155		2.76923	334.25	1.86727
2.55172	271.175	1.39008		2.79245	291.208	1.68777		2.50847	308.567	1.53225		2.34921	235.633	1.93634		2.59649	279.333	1.28831		2.64286	371.042	1.30195		2.59649	299.05	1.54881		2.42623	283.058	1.7346		2.84615	334.825	1.8718
2.62069	269.8	1.70475		2.86792	295.892	2.06897		2.57627	306.383	1.56124		2.4127	235.408	1.88707		2.66667	276.708	1.22867		2.71429	373.733	1.22179		2.66667	298.675	1.59051		2.4918	279.458	1.76041		2.92308	335.708	1.66613
2.68966	267.892	1.61939		2.9434	300.392	1.76766		2.64407	305.525	1.57769		2.47619	233.85	2.05839		2.73684	272.275	1.12238		2.78571	375.408	1.1317		2.73684	297.65	1.57665		2.55738	278.683	1.58127		3	337.075	1.49752
2.75862	267.875	1.55814		3.01887	301.858	2.09597		2.71186	305.375	1.68256		2.53968	232.908	2.04769		2.80702	268.225	1.08072		2.85714	375.1	1.34807		2.80702	296.083	1.60944		2.62295	275.55	1.61587		3.07692	343.15	1.60297
2.82759	265.9	1.62974		3.09434	300.575	1.97408		2.77966	304.958	1.73912		2.60317	231.983	2.02002		2.87719	264.467	1.07392		2.92857	375.25	1.90211		2.87719	294.075	1.59021		2.68852	275.4	1.5724		3.15385	344.658	1.81327
2.89655	265.867	1.6043		3.16981	301.392	1.80212		2.84746	303.325	2.01097		2.66667	232.842	2.05534		2.94737	262.483	1.12393		3	376.708	1.59555		2.94737	292.45	1.60944		2.7541	274.408	1.51706		3.23077	347.183	1.70161
2.96552	268.375	1.50678		3.24528	305.433	1.76537		2.91525	303.958	2.35928		2.73016	233.25	1.99655		3.01754	261.242	1.12432		3.07143	376.358	1.77716		3.01754	291.933	1.58204		2.81967	271.392	1.65292		3.30769	352.033	1.47331
3.03448	269.392	1.54045		3.32075	313.542	1.43881		2.98305	306.958	2.13726		2.79365	234.2	2.04923		3.08772	261.383	1.16017		3.14286	377.225	1.70475		3.08772	293.467	1.44843		2.88525	269.425	1.98707		3.38462	351.567	1.38157
3.10345	271.017	1.69645		3.39623	319.233	1.24479		3.05085	311.275	2.18546		2.85714	233.583	2.24469		3.15789	258.892	1.25536		3.21429	381.083	1.70811		3.15789	291.192	1.35772		2.95082	271.333	1.78415		3.46154	354.758	1.34707
3.17241	271.775	1.6153		3.4717	322.975	1.27297		3.11864	312.058	2.02595		2.92063	233.692	2.23614		3.22807	257.967	1.23137		3.28571	383.508	1.37191		3.22807	292.125	1.32745		3.01639	268.242	1.86813		3.53846	354.042	1.34206
3.24138	273.133	1.68998		3.54717	327.042	1.23379		3.18644	312.892	1.9521		2.98413	232.633	2.19026		3.29825	255.817	1.40009		3.35714	384.317	1.40133		3.29825	292.65	1.38629		3.08197	265.342	1.92425		3.61538	357.258	1.40464
3.31034	272.842	1.59263		3.62264	330.075	1.41005		3.25424	313.208	1.7075		3.04762	234.617	2.14352		3.36842	254.008	1.54692		3.42857	386.1	1.50818		3.36842	291.575	1.47485		3.14754	264.742	2.20574		3.69231	360.092	1.38629
3.37931	273.575	1.53494		3.69811	334.708	1.32619		3.32203	313.392	1.69591		3.11111	234.983	2.07284		3.4386	256.608	1.54814		3.5	388.6	1.58045		3.4386	291.608	1.42139		3.21311	261.433	1.76929		3.76923	368.425	1.3504
3.44828	272.308	1.69168		3.77358	345.475	1.02571		3.38983	311.858	1.55287		3.1746	235.917	1.7492		3.50877	257.575	1.4744		3.57143	389.025	1.38205		3.50877	289.492	1.39019		3.27869	255.275	1.61991		3.84615	374.05	1.33027
3.51724	271.992	1.49725		3.84906	341.8	0.899279		3.45763	310.575	1.52147		3.2381	235.6	1.5506		3.57895	258.192	1.47381		3.64286	389.692	1.32405		3.57895	296.742	1.13036		3.34426	251.267	1.69591		3.92308	381.917	1.30833
3.58621	276.058	1.55287		3.92453	345.7	0.90685		3.52542	310.225	1.77834		3.30159	236.292	1.58146		3.64912	258.517	1.51259		3.71429	390.767	1.40148		3.64912	304.717	0.704289		3.40984	248.525	1.74297		4	380.383	1.30236
3.65517	281.892	1.45473		4	356.133	0.88812		3.59322	308.958	1.9989		3.36508	238.408	1.73727		3.7193	264.233	1.43984		3.78571	391.792	1.37055		3.7193	311.1	0.664253		3.47541	247.925	1.63204
3.72414	289.9	1.19037						3.66102	309.375	1.91692		3.42857	236	1.74047		3.78947	266.392	1.39666		3.85714	391.783	1.48973		3.78947	315.783	0.659117		3.54098	243.208	1.38629
3.7931	295.483	1.18103						3.72881	307.475	1.58563		3.49206	235.592	1.73204		3.85965	270.342	1.15073		3.92857	392.05	1.44281		3.85965	319.742	0.627792		3.60656	239.75	1.45225
3.86207	302.642	1.07775						3.79661	302.133	1.44533		3.55556	235.892	1.98281		3.92982	271.842	1.1754		4	393.933	1.4221		3.92982	321.817	0.570204		3.67213	238.025	1.57634
3.93103	309.65	1.0013						3.86441	299.483	1.4253		3.61905	236.667	2.07284		4	276.442	1.44382						4	326.633	0.614159		3.7377	233.292	1.57616
4	318.575	0.989198						3.9322	299.633	1.47668		3.68254	238.05	2.27556														3.80328	229.583	1.44981
								4	300.292	1.52184		3.74603	240.517	2.59857														3.86885	228.825	1.49611
												3.80952	241.017	1.93565														3.93443	227.808	1.54835
												3.87302	243.042	1.97649														4	234.225	1.31171
												3.93651	242.825	1.97524
												4	245.817	2.02537

## Sheet: Raw data
Cyclist 1													Cyclist 2													Cyclist 3													Cyclist 4
PO_PLA	SampEn_PLA	PO_CAF	SamEn_CAF										PO_PLA	SampEn_PLA	PO_CAF	SamEn_CAF										PO_PLA	SampEn_PLA	PO_CAF	SamEn_CAF										PO_PLA	SampEn_PLA	PO_CAF	SamEn_CAF
253.783	0.402521	348.333	0.98788	1									295.775	0.764099	317.325	0.921495	1									369.233	1.10974	329.667	1.02073	1									264.058	0.76581	329.342	0.553233	1
271.3	0.337236	355.008	1.20094	2									293.817	0.887303	326.225	1.02075	2									382.467	1.76929	336.85	1.6864	2									267.433	0.990982	344	1.08913	2
289.325	0.410714	348.125	1.3375	3									295.008	0.842103	313.175	1.45316	3									376.392	1.77307	335.442	1.5294	3									263.092	1.13442	342.358	1.74216	3
305.3	0.537536	347.967	1.24879	4									291.792	0.927495	303.808	1.38629	4									373.608	1.56065	336.225	1.50935	4									261.442	1.11722	337.517	1.56767	4
318.267	0.790457	352.042	1.34062	5									291.3	1.12145	306.617	1.24079	5									373.758	1.43423	337.05	1.58697	5									259.758	1.10671	331.583	1.60944	5
325.025	0.990803	348.133	1.25862	6									286.15	1.20052	305.283	1.34501	6									370.192	1.3504	338	1.6946	6									258.342	1.94591	327.125	1.54853	6
327.217	1.12421	349.833	1.39149	7									282.358	1.39711	303.267	1.55931	7									365.442	1.23745	339.85	1.62992	7									256.9	1.9548	320.5	1.18562	7
322.483	1.47182	349.017	1.29277	8									280.792	1.51983	301.2	1.39025	8									356.333	1.04469	339.225	1.62362	8									255.742	1.97234	313.808	1.22465	8
322.633	1.44607	345.942	1.23146	9									291.608	1.49549	297.908	1.21135	9									349.392	1.09861	338.925	1.63225	9									251.925	1.22378	307.733	1.24319	9
321.592	1.40967	346.992	1.30236	10									302	1.30833	300.25	1.2018	10									343.6	0.888456	338.6	1.68355	10									251.7	1.16121	299.408	1.27629	10
319.75	2.1454	346.4	1.17657	11									308.875	1.37432	312.2	1.05236	11									337.092	0.852777	338.517	1.79931	11									250.733	1.14295	294.217	1.25518	11
318.925	2.11844	346.192	1.28884	12									313.358	1.4373	325.492	1.03851	12									331.842	0.815416	337.4	1.79966	12									249.142	1.16977	289.95	1.20127	12
315.992	1.31673	340.358	1.10471	13									314.808	1.39813	336.167	1.05029	13									323.55	0.824272	336.717	1.78339	13									247.592	1.26041	284.742	1.2353	13
312.225	1.5079	333.65	1.07592	14									318.383	1.4032	338.758	0.979722	14									317.117	0.914663	333.458	1.62746	14									246.583	1.17865	278.683	1.38629	14
308.042	1.55409	328.65	0.977849	15									314.825	1.51571	343.075	0.966014	15									311.217	1.00823	332.717	1.61991	15									245.258	1.18253	272.4	1.70199	15
305.075	1.55335	320.208	0.954881	16									318.933	1.4253	344.883	0.867035	16									304.133	1.34529	331.208	1.7346	16									243.917	1.19042	266.333	1.65572	16
302.85	1.5061	312.908	0.989289	17									321.125	1.35812	338.425	0.929536	17									298.5	1.39109	327.883	1.71351	17									241.542	1.21088	261.883	2.10006	17
302.425	1.48573	312.683	1.00502	18									327.5	1.44345	344.2	0.848561	18									292.942	1.58045	326.267	1.63204	18									239.617	1.23334	259.008	1.9521	18
301.3	1.42521	306.675	1.04656	19									333.8	1.53265	348.825	0.930997	19									289.233	1.46441	324.258	1.90707	19									238.85	1.18639	256.217	2.04769	19
299.617	1.56952	303.033	1.15745	20									337.533	1.49165	351.25	0.95252	20									290.242	1.43392	324.6	1.8295	20									237.192	1.16149	254.183	1.94591	20
296.6	1.57973	299.417	1.13498	21									335.85	1.678	359.458	0.965562	21									287.958	1.71864	324.442	1.7492	21									238.758	1.70161	250.933	1.87514	21
293.775	1.50408	295.442	1.15201	22									337.125	1.78479	359.283	1.11676	22									286.9	1.58924	324.067	1.79868	22									236.833	1.74664	248.85	1.95942	22
291.383	1.5631	292.175	1.29928	23									343.067	1.53882	354.167	1.1314	23									284.35	1.62924	323.467	1.94591	23									236.3	1.79176	245.717	1.9989	23
289.4	1.32711	286.775	1.31153	24									344.375	1.5506	350.183	1.28983	24									281.8	1.76099	323.583	1.9994	24									235.808	1.89712	244.058	2.13073	24
288.667	1.50219	286.225	1.56718	25									342.892	1.39568	344.292	1.31539	25									280.717	1.81773	321.842	2.06002	25									235.983	1.93794	242.95	2.21784	25
289.7	1.53393	285.683	1.3622	26									348.65	1.38174	338.858	1.31309	26									279.133	1.82735	321.533	1.72507	26									234.7	1.8718	240.483	2.21784	26
290.575	1.4031	286.467	1.44561	27									353.442	1.32914	330.958	1.24432	27									278.283	1.99036	321.142	2.17682	27									234.167	1.86075	237.917	2.22303	27
290.4	1.40369	288.767	1.52776	28									354.167	1.22454	329.358	1.34166	28									278.142	1.83828	320.142	2.03377	28									233.858	2.01882	238.308	2.24819	28
291.225	1.42372	285.767	1.37126	29									355.833	0.97405	327.942	1.21194	29									276.875	1.86075	320.867	2.10587	29									232.267	2.01882	237.792	2.24295	29
288.792	1.39045	283.575	1.39813	30									348.825	0.961141	319.85	1.2963	30									276.108	1.81327	320.767	2.35138	30									232.2	2.07206	236.733	2.12931	30
287.867	1.43239	283.05	1.42032	31									337.842	0.724238	313.55	1.25785	31									276.167	1.85772	319.975	2.23907	31									232.208	1.8589	236.975	1.96226	31
285.575	1.39893	280.142	1.41707	32									328.917	0.690606	310.375	1.22867	32									275.167	1.90211	318.467	2.11223	32									232.75	1.79815	236.125	2.30259	32
285.567	1.59963	278.392	1.32063	33									326.675	0.682509	304.683	1.49711	33									273.208	1.80555	317.417	1.92038	33									231.992	1.82589	234.783	1.81529	33
286.9	1.56862	276.333	1.32651	34									321.467	0.641262	299.833	1.63974	34									270.792	1.72804	313.508	1.97234	34									229.567	1.66188	235.017	1.86895	34
286.733	1.60944	274.633	1.30236	35									313.875	0.696287	295.725	1.49092	35									270.383	1.60944	311.092	1.70475	35									228.158	1.61741	235.642	1.82685	35
286.6	1.63083	273.392	1.26277	36									309.483	0.768966	291.583	1.68479	36									271.467	1.65658	310.292	1.56862	36									226.35	1.70788	235.525	1.90056	36
286.533	1.60443	272.742	1.73039	37									308.083	0.763059	288.525	1.49752	37									272.033	1.63576	309.575	1.48638	37									224.383	1.77374	234.425	1.88498	37
282.742	1.45893	271.175	1.39008	38									301.875	0.850776	291.208	1.68777	38									269.942	1.68176	308.567	1.53225	38									222.817	1.76473	235.633	1.93634	38
276.217	1.27736	269.8	1.70475	39									297.75	1.15577	295.892	2.06897	39									269.433	1.62362	306.383	1.56124	39									221.833	1.93908	235.408	1.88707	39
270.958	1.10777	267.892	1.61939	40									292.825	1.22139	300.392	1.76766	40									269.217	1.61397	305.525	1.57769	40									220.433	1.68777	233.85	2.05839	40
268.533	1.07705	267.875	1.55814	41									282.15	1.22459	301.858	2.09597	41									267.85	1.66351	305.375	1.68256	41									221.467	1.6614	232.908	2.04769	41
267.975	1.07304	265.9	1.62974	42									282.583	1.17307	300.575	1.97408	42									265.625	1.77374	304.958	1.73912	42									222.117	1.64223	231.983	2.02002	42
264.867	1.20397	265.867	1.6043	43									297.092	1.18427	301.392	1.80212	43									264.55	1.70788	303.325	2.01097	43									220.875	1.75094	232.842	2.05534	43
262.625	1.35688	268.375	1.50678	44									311	1.13902	305.433	1.76537	44									261.683	1.62693	303.958	2.35928	44									221.842	1.9231	233.25	1.99655	44
261.142	1.22807	269.392	1.54045	45									315.492	1.25276	300.942	1.9459	45									260.992	1.5272	306.958	2.13726	45									222.467	1.67669	234.2	2.04923	45
257.7	1.22297	271.017	1.69645	46									326.575	1.0325	301.275	1.95739	46									260.992	1.47381	311.275	2.18546	46									223.4	1.68808	233.583	2.24469	46
255.508	1.26601	271.775	1.6153	47									334.275	0.964182	302.467	1.84719	47									260.842	1.45001	312.058	2.02595	47									224.683	1.62531	233.692	2.23614	47
252.6	1.32301	273.133	1.68998	48									339.008	0.961411	313.542	1.43881	48									258.542	1.41866	312.892	1.9521	48									229.075	1.40035	232.633	2.19026	48
250.092	1.36372	272.842	1.59263	49									351.092	0.821896	319.233	1.24479	49									257.242	1.32034	313.208	1.7075	49									230.683	1.57435	234.617	2.14352	49
249.717	1.26809	273.575	1.53494	50									354.875	0.881457	322.975	1.27297	50									257.333	1.32176	313.392	1.69591	50									233.083	1.59645	234.983	2.07284	50
251.008	1.79769	272.308	1.69168	51									365.625	0.884382	327.042	1.23379	51									254.858	1.93486	311.858	1.55287	51									234.083	1.56996	235.917	1.7492	51
253.4	1.79749	271.992	1.49725	52									368.633	0.936769	330.075	1.41005	52									252.117	1.46821	310.575	1.52147	52									235.442	1.7148	235.6	1.5506	52
253.9	1.81449	276.058	1.55287	53									375.217	1.10272	334.708	1.32619	53									251.075	1.57867	310.225	1.77834	53									236.442	1.90793	236.292	1.58146	53
254.175	1.84372	281.892	1.45473	54									379.258	1.16821	345.475	1.02571	54									254.017	1.58329	308.958	1.9989	54									236.35	1.97408	238.408	1.73727	54
256.2	1.77156	273.318	1.19037	55									381.65	1.13943	341.8	0.899279	55									254.508	1.52184	309.375	1.91692	55									236.917	1.90954	236	1.74047	55
257.825	1.83258	274.778	1.18103	56									378.158	1.2104	345.7	0.90685	56									255.892	1.89417	307.475	1.58563	56									235.633	2.07284	235.592	1.73204	56
257.8	1.80049	275.165	1.07775	57									375.317	0.994039	356.133	0.88812	57									258.658	1.95303	302.133	1.44533	57									236.033	2.00821	235.892	1.98281	57
257.817	1.71765	275.562	1.0013	58																						257.283	1.65999	299.483	1.4253	58									237.425	2.25129	236.667	2.07284	58
258.442	1.6181	281.892	0.989198	59																						257.583	1.70811	299.633	1.47668	59									241.55	1.62746	238.05	2.27556	59
262.125	1.68858	289.9	1.59322	60																						259.717	1.7123	300.292	1.52184	60									236.233	1.99117	236.473	1.79815	60
269.017	1.39331	295.483	1.55402	61																						261.508	1.67398	311.858	1.55287	61									236.502	2.06047	236.038	1.88204	61
276.2	1.40534	302.642	1.48697	62																																			237.66	1.98995	236.55	2.01581	62
284.125	1.39777	309.65	1.42799	63																																			243.108	1.58989	240.517	2.59857	63
293.825	1.39013	318.575	1.22597	64																																			245.142	1.54962	241.017	1.93565	64
301.283	1.45725	302.592	1.08669	65																																			245.967	1.31058	243.042	1.97649	65
308.933	1.38157	310.289	1.02275	66																																			245.892	1.32338	242.825	1.97524	66
																																							251.433	1.27297	245.817	2.02537	67
